# Supplementary material for: Improving the electrochemical performance of a natural molybdenite/N-doped graphene composite anode for lithium-ion batteries via short-time microwave irradiation
Source: Royal Society of Chemistry journal article supplement (doi:10.1039/d0ra07758e), 2020-01-01
Supplement: d0ra07758e1.pdf [file d0ra07758e1.pdf]

## Improving electrochemical performance of natural molybdenite/N-doped graphene composited anode for lithium-ion batteries via short-time microwave irradiation

Shuonan Wang,<sup>a</sup> Yun Hai,<sup>a</sup> Bin Zhou,<sup>b</sup> Hao Liu\*<sup>b</sup> and Libing Liao\*<sup>a</sup>

Corresponding author: Hao Liu, liuhao1398@cugb.edu.cn

Libing Liao, clayl@cugb.edu.cn

<sup>a</sup> Beijing Key laboratory of Materials Utilization of Nonmetallic Minerals and Solid Wastes, National Laboratory of Mineral Materials,

School of Materials Science and Technology, China University of Geosciences, Beijing, 100083, PR China

<sup>b</sup> School of Science, China University of Geosciences, Beijing, 100083, PR China

**Table S1.** Electrochemical performance of MoS<sub>2</sub>-based electrode materials

| Material                         | Binder/electrolyte                                                      | Stability                                                                                 | Rate capacity                                     | Reference  |
|----------------------------------|-------------------------------------------------------------------------|-------------------------------------------------------------------------------------------|---------------------------------------------------|------------|
| natural MoS <sub>2</sub> -1 μm   | CMC/1 M LiClO <sub>4</sub> in EC and DMC (1:1, v-v)                     | 1337 mAh g <sup>-1</sup> (147.9 % of initial) after 125 cycles at 0.1 A g <sup>-1</sup>   | 682 mAh g <sup>-1</sup> at 5.0 A g <sup>-1</sup>  | <b>【1】</b> |
| Natural ore-Molybdenite          | PVDF/1 M LiClO <sub>4</sub> in EC and DMC (1:1, v-v)                    | 234 mAh g <sup>-1</sup> (22 % of initial) after 125 cycles at 0.1 A g <sup>-1</sup>       | <302 mAh g <sup>-1</sup> at 1.0 A g <sup>-1</sup> | <b>【2】</b> |
| Natural ore-Molybdenite          | CMC/1 M LiClO <sub>4</sub> in EC and DMC (1:1, v-v)                     | 863 mAh g <sup>-1</sup> (72 % of initial) after 100 cycles at 2.0 A g <sup>-1</sup>       | 682 mAh g <sup>-1</sup> at 2.0 A g <sup>-1</sup>  | <b>【2】</b> |
| MoS <sub>2</sub> /N-graphene     | PVDF/1 M LiPF <sub>6</sub> in EC and DMC (1:1, v-v)                     | 1025 mAh g <sup>-1</sup> (57.3 % of initial) after 100 cycles at 0.1 A g <sup>-1</sup>    | 648 mAh g <sup>-1</sup> at 1.0 A g <sup>-1</sup>  | <b>【3】</b> |
| MoS <sub>2</sub> /graphene       | PVDF/1 M LiPF <sub>6</sub> in ethylene EC and DMC (1:1, v-v)            | 406.3 mAh g <sup>-1</sup> (57 % of initial) after 100 cycles at 0.1 A g <sup>-1</sup>     | <400 mAh g <sup>-1</sup> at 1.0 A g <sup>-1</sup> | <b>【3】</b> |
| MoS <sub>2</sub> @C/RGO          | PVDF/ 1 M LiPF <sub>6</sub> in ethylene EC, DEC and MEC (1:1, v-v)      | 1189 mAh g <sup>-1</sup> (107.9 % of initial) after 100 cycles at 0.2 A g <sup>-1</sup>   | 726 mAh g <sup>-1</sup> at 2.0 A g <sup>-1</sup>  | <b>【4】</b> |
| MoS <sub>2</sub> /holey graphene | PVDF/1 M LiPF <sub>6</sub> in ethylene EC and DMC (1:1, v-v)            | —                                                                                         | 408 mAh g <sup>-1</sup> at 1.0 A g <sup>-1</sup>  | <b>【5】</b> |
| MoS <sub>2</sub> /C fibers       | PVDF/1 M LiPF <sub>6</sub> in ethylene EC and DMC (1:1, v-v)            | 620 mAh g <sup>-1</sup> (107.9 % of initial) after 50 cycles at 0.1 A g <sup>-1</sup>     | 260 mAh g <sup>-1</sup> at 1.0 A g <sup>-1</sup>  | <b>【6】</b> |
| C@MoS <sub>2</sub>               | PVDF/ not mention                                                       | 750 mAh g <sup>-1</sup> (63 % of initial) after 50 cycles at 0.2 A g <sup>-1</sup>        | 349 mAh g <sup>-1</sup> at 2.0 A g <sup>-1</sup>  | <b>【7】</b> |
| C@MoS <sub>2</sub> /PEDOT:PSS    | PVDF/1 M LiPF <sub>6</sub> in ethylene EC and DMC (1:1, v-v)            | 575 mAh g <sup>-1</sup> (81 % of initial) after 100 cycles at 0.05 A g <sup>-1</sup>      | 363 mAh g <sup>-1</sup> at 0.3 A g <sup>-1</sup>  | <b>【8】</b> |
| Natural MoS <sub>2</sub> /NG-MW  | sodium alginate/1 M LiPF <sub>6</sub> in ethylene EC and DMC (1:1, v-v) | 453.7 mAh g <sup>-1</sup> (45.6 % of initial) after 150 cycles at 0.067 A g <sup>-1</sup> | 638 mAh g <sup>-1</sup> at 1.34 A g <sup>-1</sup> | This work  |

## Reference

1. F. Jiang, S. Li, P. Ge, H. Tang, S. A. Khoso, C. Zhang, Y. Yang, H. Hou, Y. Hu, W. Sun and X. Ji, *Frontiers of Chemistry*, 2018, **6**, 389.
2. S. Li, H. Tang, P. Ge, F. Jiang, J. Zhou, C. Zhang, H. Hou, W. Sun and X. Ji, *ACS Appl Mater Interfaces*, 2018, **10**, 6378-6389.
3. S. Xia, Y. Wang, Y. Liu, C. Wu, M. Wu and H. Zhang, *Chemical Engineering Journal*, 2018, **332**, 431-439.
4. S. Li, P. Liu, X. Huang, Y. Tang and H. Wang, *Journal of Materials Chemistry A*, 2019, **7**, 10988-10997.
5. S. G. Stolyarova, V. O. Koroteev, K. I. Baskakova, A. A. Makarova, A. V. Okotrub and L. G. Bulusheva, *Fullerenes, Nanotubes and Carbon Nanostructures*, 2020, **28**, 328-334.
6. X. Chen, L. Li, S. Wang, C. Feng and Z. Guo, *Materials Letters*, 2016, **164**, 595-598.
7. Y. Zhang, Y. Wang, J. Yang, W. Shi, H. Yang, W. Huang and X. Dong, *2D Materials*, 2016, **3**.
8. X. Zhao, Y. Mai, H. Luo, D. Tang, B. Lee, C. Huang and L. Zhang, *Applied Surface Science*, 2014, **288**, 736-741.

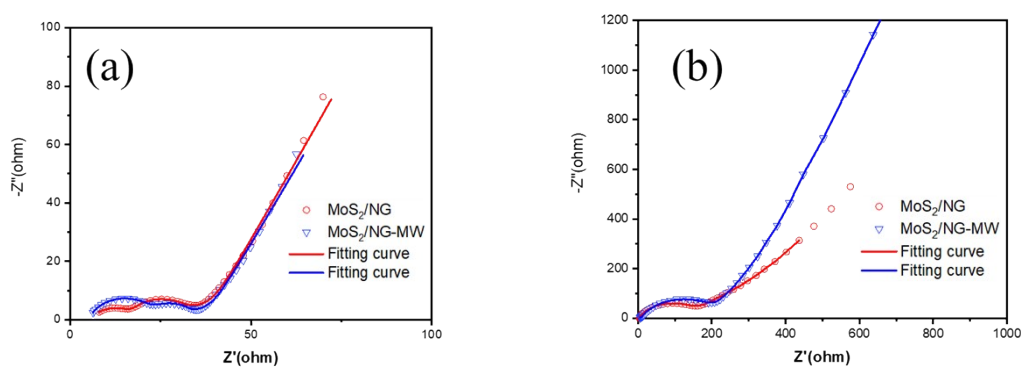

Figure S1. EIS curves of MoS<sub>2</sub>/NG and MoS<sub>2</sub>/NG-MW electrode after (a) 50 cycles and (b) 150 cycles.
